# Supplementary material for: Identification of L-Valine-initiated-germination-active genes in Bacillus subtilis using Tn-seq
Source: PubMed Central journal article supplement (PMC6568419; doi:10.1371/journal.pone.0218220), 2019-06-14
Supplement: pone.0218220.s001.pdf [file pone.0218220.s001.pdf]

## **S1 File**

Supplemental Materials for:

### **Identification of Germination-Active Genes in *Bacillus subtilis* using TnSeq**

Cameron Sayer, Bidisha Barat, and David L. Popham

**Table A. *B. subtilis* strains used in this study.**

| Strain  | Genotype                                                     | Source/Construction                 |
|---------|--------------------------------------------------------------|-------------------------------------|
| DPVB724 | $\Delta gerB$ Cm <sup>R</sup>                                | FB72 [1]→PS832                      |
| DPVB726 | $\Delta gerA$ Sp <sup>R</sup> $\Delta gerB$ Cm <sup>R</sup>  | FB72 [1]→PS832                      |
| DPVB747 | $\Delta skfE$ MLS <sup>R</sup>                               | BKE01950 <sup>a</sup> →PS832        |
| DPVB748 | $\Delta pcrB$ MLS <sup>R</sup>                               | BKE06600 <sup>a</sup> →PS832        |
| DPVB749 | $\Delta ygaC$ MLS <sup>R</sup>                               | BKE08680 <sup>a</sup> →PS832        |
| DPVB750 | $\Delta sipT$ MLS <sup>R</sup>                               | BKE14410 <sup>a</sup> →PS832        |
| DPVB751 | $\Delta ylbC$ MLS <sup>R</sup>                               | BKE14960 <sup>a</sup> →PS832        |
| DPVB752 | $\Delta hfq$ MLS <sup>R</sup>                                | BKE17340 <sup>a</sup> →PS832        |
| DPVB753 | $\Delta yqhL$ MLS <sup>R</sup>                               | BKE24540 <sup>a</sup> →PS832        |
| DPVB754 | $\Delta dnaJ$ MLS <sup>R</sup>                               | BKE25460 <sup>a</sup> →PS832        |
| DPVB755 | $\Delta yqeF$ MLS <sup>R</sup>                               | BKE25700 <sup>a</sup> →PS832        |
| DPVB756 | $\Delta phoR$ MLS <sup>R</sup>                               | BKE29100 <sup>a</sup> →PS832        |
| DPVB757 | $\Delta phoP$ MLS <sup>R</sup>                               | BKE29110 <sup>a</sup> →PS832        |
| DPVB758 | $\Delta ytxG$ MLS <sup>R</sup>                               | BKE29780 <sup>a</sup> →PS832        |
| DPVB759 | $\Delta ytpA$ MLS <sup>R</sup>                               | BKE30510 <sup>a</sup> →PS832        |
| DPVB760 | $\Delta yybT$ MLS <sup>R</sup>                               | BKE40510 <sup>a</sup> →PS832        |
| DPVB761 | <i>gerA-lacZ</i> MLS <sup>R</sup>                            | PS767 [2, 3]→PS832                  |
| DPVB763 | $\Delta skfE$ MLS <sup>R</sup> $\Delta gerB$ Cm <sup>R</sup> | DPVB724→DPVB747                     |
| DPVB764 | $\Delta pcrB$ MLS <sup>R</sup> $\Delta gerB$ Cm <sup>R</sup> | DPVB724→DPVB748                     |
| DPVB765 | $\Delta ygaC$ MLS <sup>R</sup> $\Delta gerB$ Cm <sup>R</sup> | DPVB724→DPVB749                     |
| DPVB766 | $\Delta sipT$ MLS <sup>R</sup> $\Delta gerB$ Cm <sup>R</sup> | DPVB724→DPVB750                     |
| DPVB767 | $\Delta ylbC$ MLS <sup>R</sup> $\Delta gerB$ Cm <sup>R</sup> | DPVB724→DPVB751                     |
| DPVB768 | $\Delta hfq$ MLS <sup>R</sup> $\Delta gerB$ Cm <sup>R</sup>  | DPVB724→DPVB752                     |
| DPVB769 | $\Delta yqhL$ MLS <sup>R</sup> $\Delta gerB$ Cm <sup>R</sup> | DPVB724→DPVB753                     |
| DPVB770 | $\Delta dnaJ$ MLS <sup>R</sup> $\Delta gerB$ Cm <sup>R</sup> | DPVB724→DPVB754                     |
| DPVB771 | $\Delta yqeF$ MLS <sup>R</sup> $\Delta gerB$ Cm <sup>R</sup> | DPVB724→DPVB755                     |
| DPVB772 | $\Delta phoR$ MLS <sup>R</sup> $\Delta gerB$ Cm <sup>R</sup> | DPVB724→DPVB756                     |
| DPVB773 | $\Delta phoP$ MLS <sup>R</sup> $\Delta gerB$ Cm <sup>R</sup> | DPVB724→DPVB757                     |
| DPVB774 | $\Delta ytxG$ MLS <sup>R</sup> $\Delta gerB$ Cm <sup>R</sup> | DPVB724→DPVB758                     |
| DPVB775 | $\Delta ytpA$ MLS <sup>R</sup> $\Delta gerB$ Cm <sup>R</sup> | DPVB724→DPVB759                     |
| DPVB776 | $\Delta yybT$ MLS <sup>R</sup> $\Delta gerB$ Cm <sup>R</sup> | DPVB724→DPVB760                     |
| DPVB805 | $\Delta skfE$                                                | Cre expression for deletion of MLSR |
| DPVB806 | $\Delta pcrB$                                                | Cre expression for deletion of MLSR |
| DPVB807 | $\Delta ygaC$                                                | Cre expression for deletion of MLSR |
| DPVB808 | $\Delta sipT$                                                | Cre expression for deletion of MLSR |
| DPVB809 | $\Delta ylbC$                                                | Cre expression for deletion of MLSR |
| DPVB810 | $\Delta hfq$                                                 | Cre expression for deletion of MLSR |
| DPVB811 | $\Delta yqhL$                                                | Cre expression for deletion of MLSR |
| DPVB812 | $\Delta dnaJ$                                                | Cre expression for deletion of MLSR |
| DPVB813 | $\Delta yqeF$                                                | Cre expression for deletion of MLSR |
| DPVB814 | $\Delta phoR$                                                | Cre expression for deletion of MLSR |
| DPVB815 | $\Delta phoP$                                                | Cre expression for deletion of MLSR |
| DPVB816 | $\Delta ytxG$                                                | Cre expression for deletion of MLSR |
| DPVB817 | $\Delta ytpA$                                                | Cre expression for deletion of MLSR |
| DPVB818 | $\Delta yybT$                                                | Cre expression for deletion of MLSR |
| DPVB819 | $\Delta skfE$ <i>gerA-lacZ</i> MLS <sup>R</sup>              | DPVB761→DPVB805                     |
| DPVB820 | $\Delta pcrB$ <i>gerA-lacZ</i> MLS <sup>R</sup>              | DPVB761→DPVB806                     |
| DPVB821 | $\Delta ygaC$ <i>gerA-lacZ</i> MLS <sup>R</sup>              | DPVB761→DPVB807                     |
| DPVB822 | $\Delta sipT$ <i>gerA-lacZ</i> MLS <sup>R</sup>              | DPVB761→DPVB808                     |
| DPVB823 | $\Delta ylbC$ <i>gerA-lacZ</i> MLS <sup>R</sup>              | DPVB761→DPVB809                     |

|         |                                                   |                 |
|---------|---------------------------------------------------|-----------------|
| DPVB824 | $\Delta hfq$ <i>gerA-lacZ</i> MLS <sup>R</sup>    | DPVB761→DPVB810 |
| DPVB825 | $\Delta yqhL$ <i>gerA-lacZ</i> MLS <sup>R</sup>   | DPVB761→DPVB811 |
| DPVB826 | $\Delta dnaJ$ <i>gerA-lacZ</i> MLS <sup>R</sup>   | DPVB761→DPVB812 |
| DPVB827 | $\Delta yqeF$ <i>gerA-lacZ</i> MLS <sup>R</sup>   | DPVB761→DPVB813 |
| DPVB828 | $\Delta phoR$ <i>gerA-lacZ</i> MLS <sup>R</sup>   | DPVB761→DPVB814 |
| DPVB829 | $\Delta phoP$ <i>gerA-lacZ</i> MLS <sup>R</sup>   | DPVB761→DPVB815 |
| DPVB830 | $\Delta ytxG$ <i>gerA-lacZ</i> MLS <sup>R</sup>   | DPVB761→DPVB816 |
| DPVB831 | $\Delta ytpA$ <i>gerA-lacZ</i> MLS <sup>R</sup>   | DPVB761→DPVB817 |
| DPVB832 | $\Delta yybT$ <i>gerA-lacZ</i> MLS <sup>R</sup>   | DPVB761→DPVB818 |
| DPVB833 | <i>PsspD::gerA</i> MLS <sup>R</sup>               | PS3476 [4]      |
| DPVB834 | $\Delta skfE$ <i>PsspD::gerA</i> MLS <sup>R</sup> | DPVB833→DPVB805 |
| DPVB835 | $\Delta pcrB$ <i>PsspD::gerA</i> MLS <sup>R</sup> | DPVB833→DPVB806 |
| DPVB836 | $\Delta ygaC$ <i>PsspD::gerA</i> MLS <sup>R</sup> | DPVB833→DPVB807 |
| DPVB837 | $\Delta sipT$ <i>PsspD::gerA</i> MLS <sup>R</sup> | DPVB833→DPVB808 |
| DPVB838 | $\Delta ylbC$ <i>PsspD::gerA</i> MLS <sup>R</sup> | DPVB833→DPVB809 |
| DPVB839 | $\Delta hfq$ <i>PsspD::gerA</i> MLS <sup>R</sup>  | DPVB833→DPVB810 |
| DPVB840 | $\Delta yqhL$ <i>PsspD::gerA</i> MLS <sup>R</sup> | DPVB833→DPVB811 |
| DPVB841 | $\Delta dnaJ$ <i>PsspD::gerA</i> MLS <sup>R</sup> | DPVB833→DPVB812 |
| DPVB842 | $\Delta yqeF$ <i>PsspD::gerA</i> MLS <sup>R</sup> | DPVB833→DPVB813 |
| DPVB843 | $\Delta phoR$ <i>PsspD::gerA</i> MLS <sup>R</sup> | DPVB833→DPVB814 |
| DPVB844 | $\Delta phoP$ <i>PsspD::gerA</i> MLS <sup>R</sup> | DPVB833→DPVB815 |
| DPVB845 | $\Delta ytxG$ <i>PsspD::gerA</i> MLS <sup>R</sup> | DPVB833→DPVB816 |
| DPVB846 | $\Delta ytpA$ <i>PsspD::gerA</i> MLS <sup>R</sup> | DPVB833→DPVB817 |
| DPVB847 | $\Delta yybT$ <i>PsspD::gerA</i> MLS <sup>R</sup> | DPVB833→DPVB818 |

<sup>a</sup> Strain obtained from the Bacillus Genetic Stock Center

**Table B. Long-term germination efficiency of *B. subtilis* mutant strains<sup>a</sup>**

| Strain      | Colonies after 24 hr<br>(cfu/mL/OD) | New colonies after 48 hr<br>(cfu/mL/OD) |
|-------------|-------------------------------------|-----------------------------------------|
| Wild type   | 3.5x10 <sup>8</sup>                 | 0                                       |
| <i>dnaJ</i> | 9.6x10 <sup>8</sup>                 | 0                                       |
| <i>hfq</i>  | 3.2x10 <sup>8</sup>                 | 0                                       |
| <i>pcrB</i> | 1.7x10 <sup>8</sup>                 | 6.0x10 <sup>6</sup>                     |
| <i>phoP</i> | 3.7x10 <sup>8</sup>                 | 0                                       |
| <i>phoR</i> | 3.5x10 <sup>8</sup>                 | 0                                       |
| <i>sipT</i> | 1.4x10 <sup>8</sup>                 | 4.0x10 <sup>6</sup>                     |
| <i>skfE</i> | 9.2x10 <sup>7</sup>                 | 1.0x10 <sup>6</sup>                     |
| <i>ygaC</i> | 4.0x10 <sup>8</sup>                 | 1.0x10 <sup>7</sup>                     |
| <i>ylbC</i> | 1.4x10 <sup>8</sup>                 | 7.0x10 <sup>6</sup>                     |
| <i>yqeF</i> | 1.7x10 <sup>8</sup>                 | 0                                       |
| <i>yqhL</i> | 2.5x10 <sup>8</sup>                 | 0                                       |
| <i>ytpA</i> | 1.8x10 <sup>8</sup>                 | 0                                       |
| <i>ytxG</i> | 1.2x10 <sup>8</sup>                 | 0                                       |
| <i>yybT</i> | 2.8x10 <sup>8</sup>                 | 1.0x10 <sup>7</sup>                     |

<sup>a</sup> Values are from a single determination for each strain. Purified spores were serially diluted, plated on 2xSG medium, and incubated at 37°C.

**Table C. Spore germination in response to diverse germinants following overexpression of *gerA*.**

| Genotype    | % OD Loss at 60 mins with 1X AGFK |                        | % OD Loss at 40 mins with 2xYT |                        |
|-------------|-----------------------------------|------------------------|--------------------------------|------------------------|
|             | without <i>sspDp-gerA</i>         | with <i>sspDp-gerA</i> | without <i>sspDp-gerA</i>      | with <i>sspDp-gerA</i> |
| Wild type   | 13 ± 4                            | 4 ± 1.3*               | 34 ± 2                         | 34 ± 1                 |
| <i>dnaJ</i> | 6 ± 3*                            | 1 ± 2*                 | 23 ± 0*                        | 29 ± 2                 |
| <i>hfq</i>  | 9 ± 5                             | 5 ± 1*                 | 33 ± 1                         | 33 ± 2                 |
| <i>pcrB</i> | 5 ± 1*                            | 0 ± 1*                 | 31 ± 0                         | 36 ± 3                 |
| <i>phoP</i> | 8 ± 3                             | 1 ± 1*                 | 33 ± 0                         | 30 ± 1                 |
| <i>phoR</i> | 5 ± 4*                            | 1 ± 1*                 | 32 ± 3                         | 36 ± 4                 |
| <i>sipT</i> | 6 ± 6*                            | 0 ± 1*                 | 30 ± 6                         | 33 ± 1                 |
| <i>skfE</i> | 4 ± 5*                            | 3 ± 1*                 | 32 ± 4                         | 35 ± 0                 |
| <i>ygaC</i> | 10 ± 1*                           | 1 ± 4*                 | 31 ± 3                         | 32 ± 5                 |
| <i>ylbC</i> | 5 ± 4*                            | 0 ± 1*                 | 16 ± 2*                        | 31 ± 0                 |
| <i>yqeF</i> | 5 ± 2*                            | 4 ± 2*                 | 33 ± 5                         | 28 ± 3                 |
| <i>yqhL</i> | 16 ± 5                            | 0 ± 1*                 | 34 ± 4                         | 30 ± 1                 |
| <i>ytpA</i> | 18 ± 2                            | 13 ± 1                 | 30 ± 1                         | 33 ± 1                 |
| <i>ytxG</i> | 7 ± 5                             | 0 ± 2*                 | 26 ± 2*                        | 29 ± 8                 |
| <i>yybT</i> | 17 ± 2                            | 0 ± 0*                 | 29 ± 1                         | 36 ± 4                 |

<sup>a</sup> Values are averages and standard deviations of assays on three replicate spore preparations. OD<sub>600</sub> of purified spore suspension monitored at the indicated time after addition of 1X AGFK or 2xYT while shaking at 37°. \* indicates a significant difference from the wild type without P<sub>sspD-gerA</sub> (p<0.05).

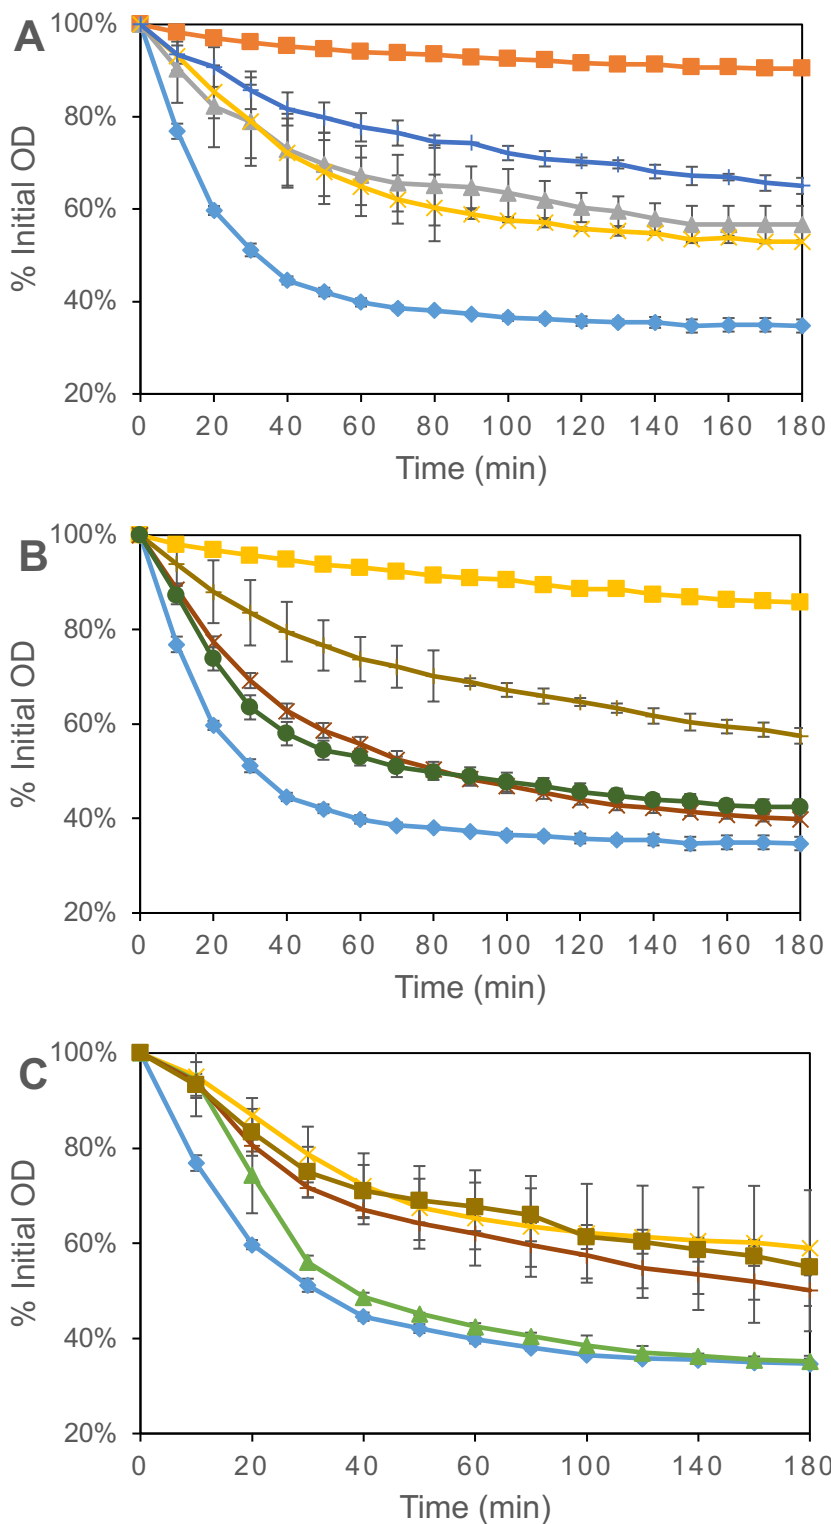

**Figure A. Germination rates of *B. subtilis* strains.**

Purified spores of *B. subtilis* wild type and mutant strains were heat activated, stimulated to germinate by addition of 10 mM L-Val, and shaken at 37°C, during which the OD<sub>600</sub> was monitored. Values are averages of three assays and error bars are standard deviations. Each assay was performed on three replicate spore preparations. A) Wild type ♦, *ytxG* X, *yqhL* ▲, *ygaC* +, *dnaJ* ■ B) Wild type ♦, *phoR* X, *hfq* +, *sipT* ■, *yybT* ● C) Wild type ♦, *sfkE* X, *pcrB* ▲, *yqeF* +, *ytpA* ■.

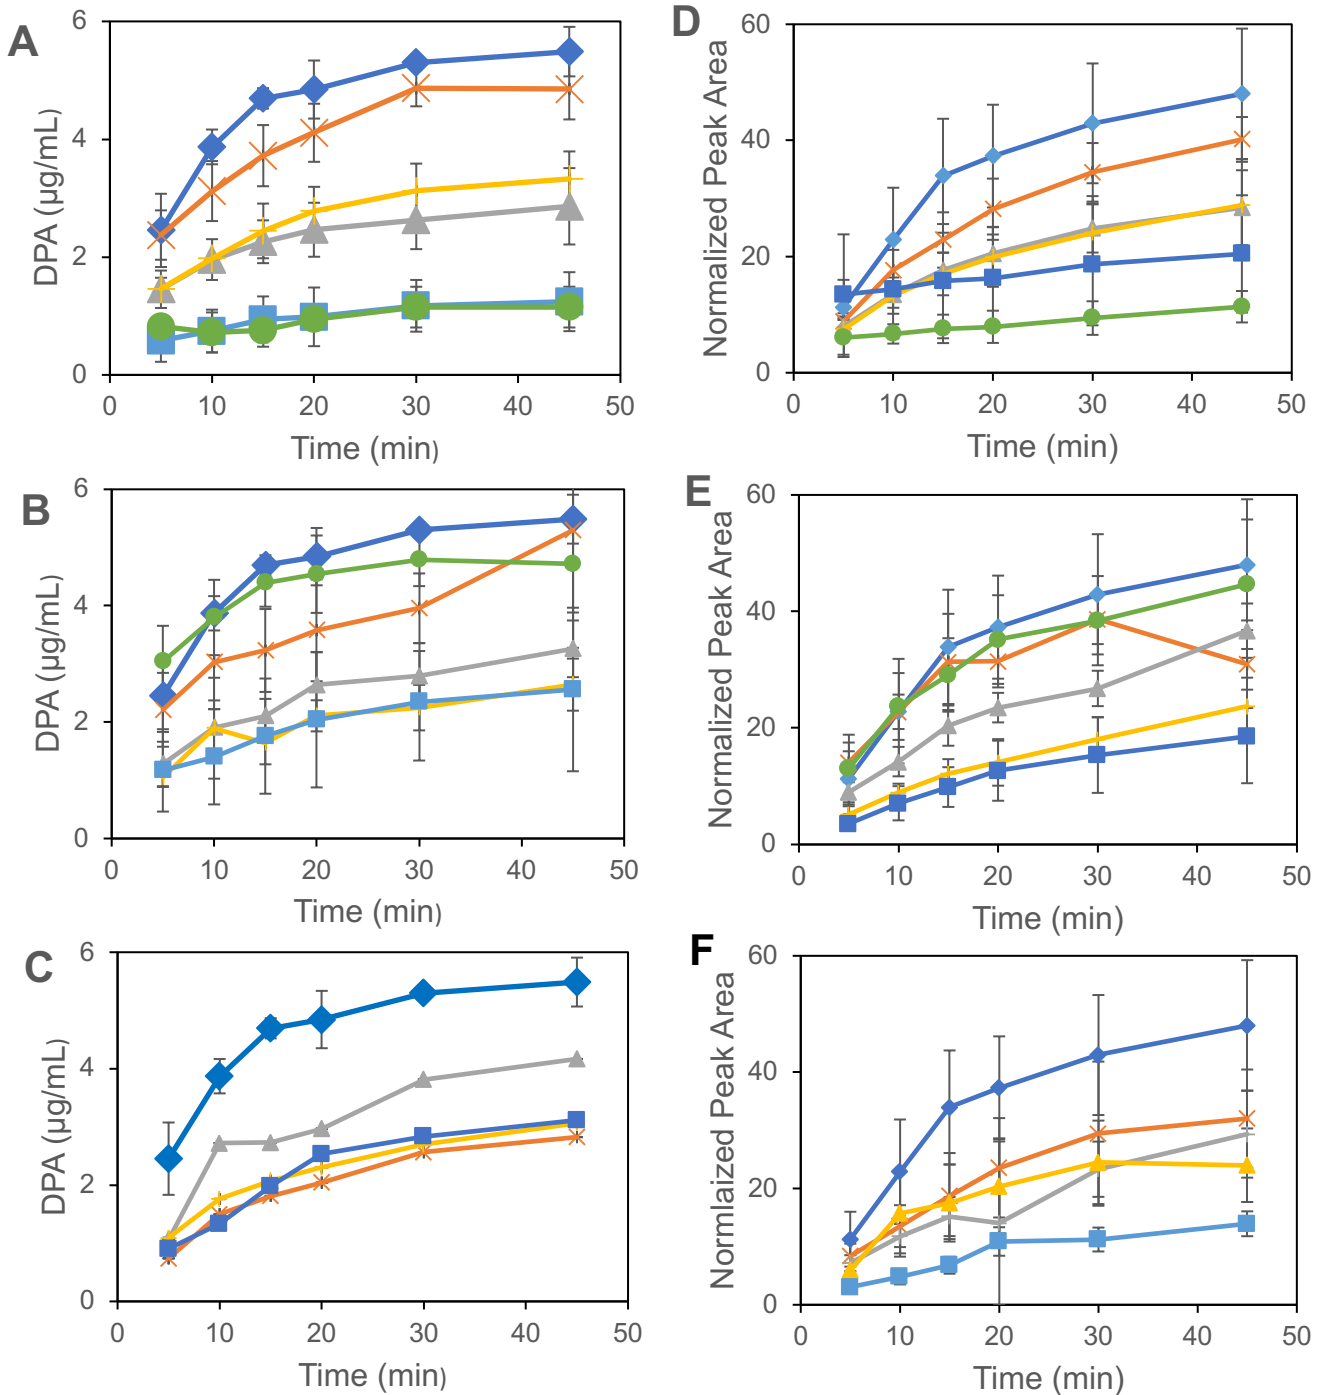

**Figure B. Release of DPA and NAM by *B. subtilis* strains.**

Purified spores were heat activated, stimulated to germinate by addition of 10 mM L-Val, and shaken at 37°C. Samples were taken at designated intervals, centrifuged, and the supernatant was saved for later analysis. Values are averages of three assays for DPA (panels A-C) and NAM (panels D-F), and error bars are standard deviations. Each assay was performed on three replicate spore preparations. Panels A and D: Wild type  $\blacklozenge$ , *ytxG*  $\times$ , *yqhL*  $\blacktriangle$ , *ygaC*  $+$ , *dnaJ*  $\blacksquare$ , *ylbC*  $\bullet$ . Panels B and E: Wild type  $\blacklozenge$ , *phoR*  $\times$ , *phoP*  $\blacktriangle$ , *hfq*  $+$ , *sipT*  $\blacksquare$ , *yybT*  $\bullet$ . Panels C and F: Wild type  $\blacklozenge$ , *sfkE*  $\times$ , *pcrB*  $\blacktriangle$ , *yqeF*  $+$ , *ytpA*  $\blacksquare$ . For DPA release: *dnaJ*, *ylbC*, *yqeF*, and *ytpA* strains are significantly different from the wild type at all time points; *hfq*, *phoP*, *sipT*, *ygaC*, and *yqhL* strains are significantly different from 10 min onwards; and *pcrB*, *phoR*, *yybT*, and *ytxG* strains are not significantly different from the wild type. For NAM release: *sipT*, *ylbC*, and *ytpA* strains are significantly different from the wild type from 20 min onwards. Some other strains exhibited reduced NAM release, but this was not found to be significant due to high variability between replicates.

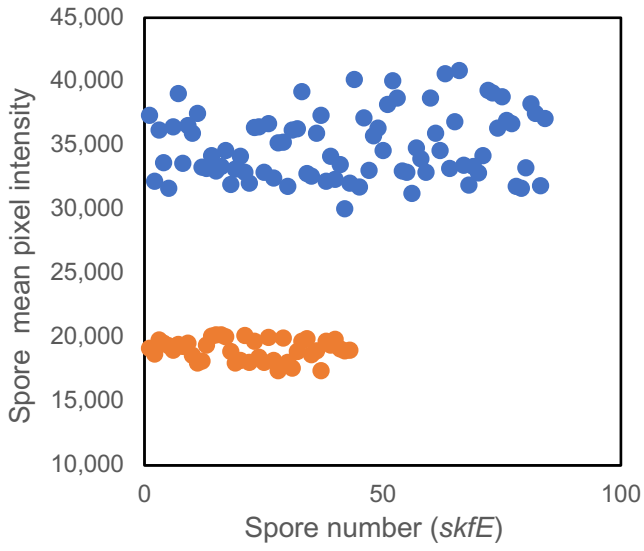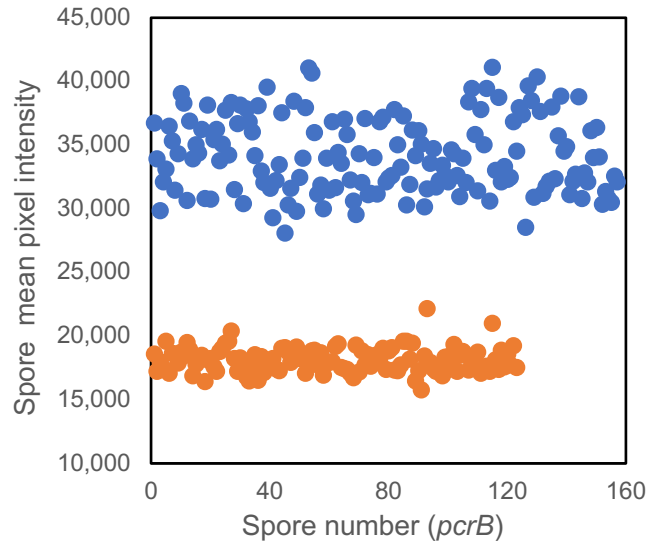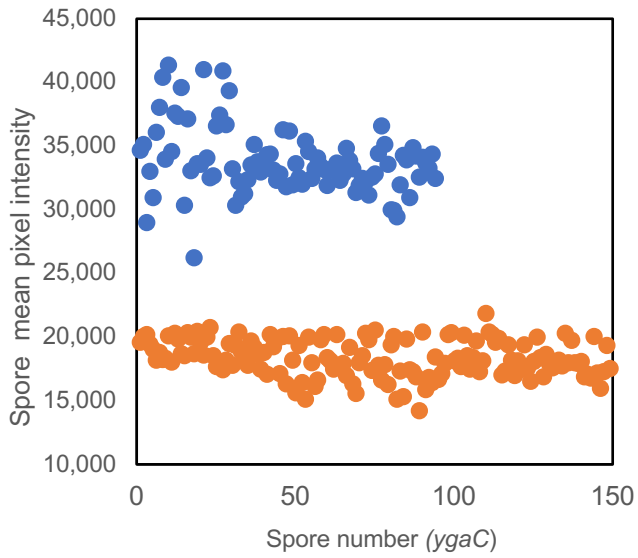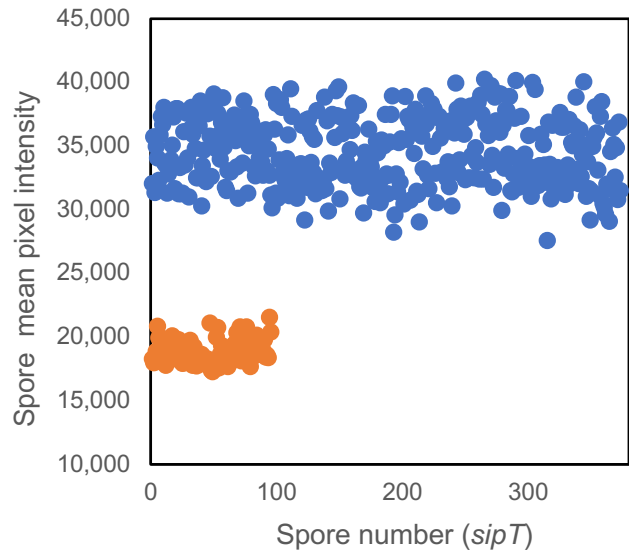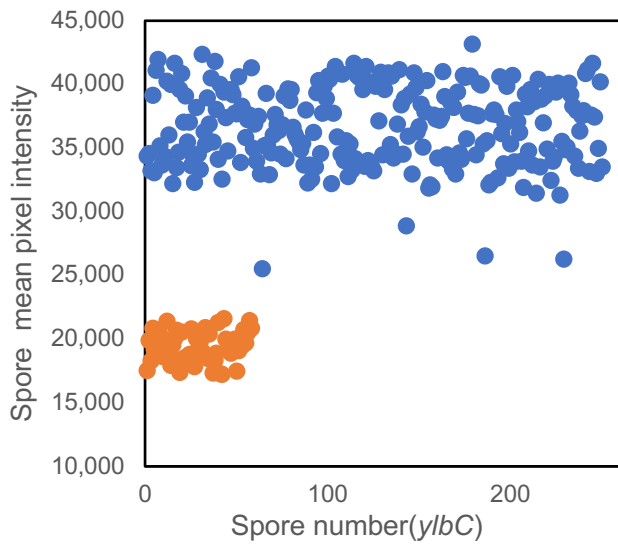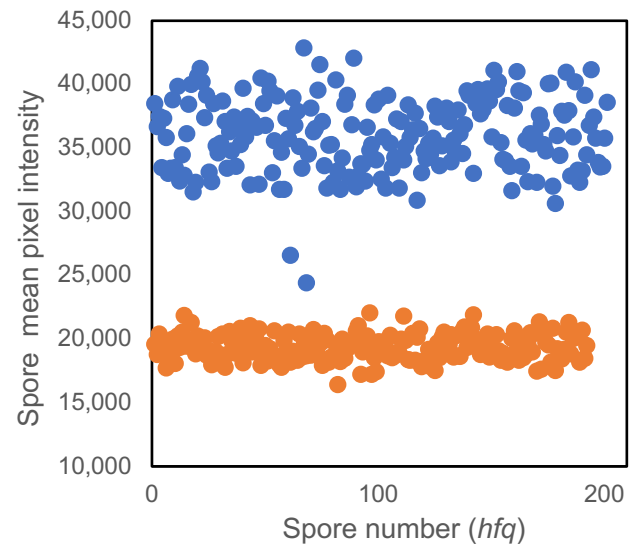



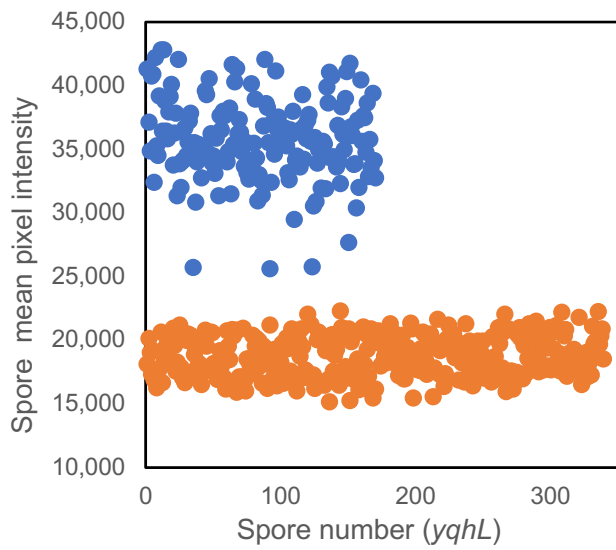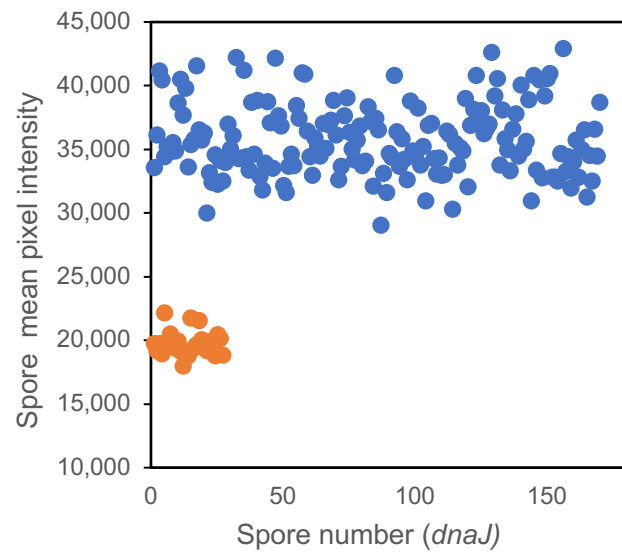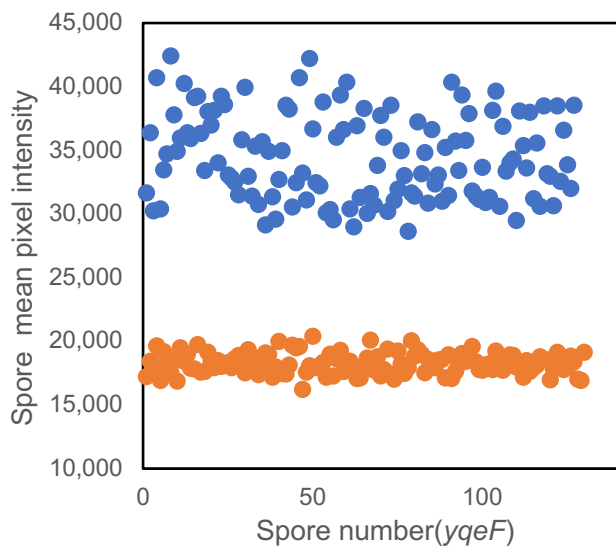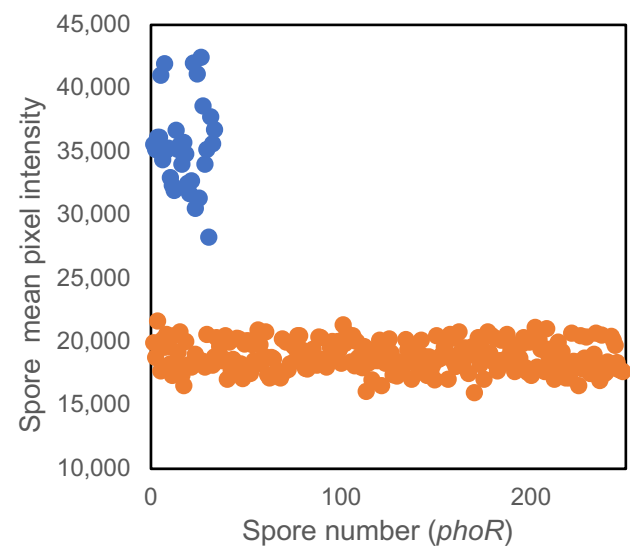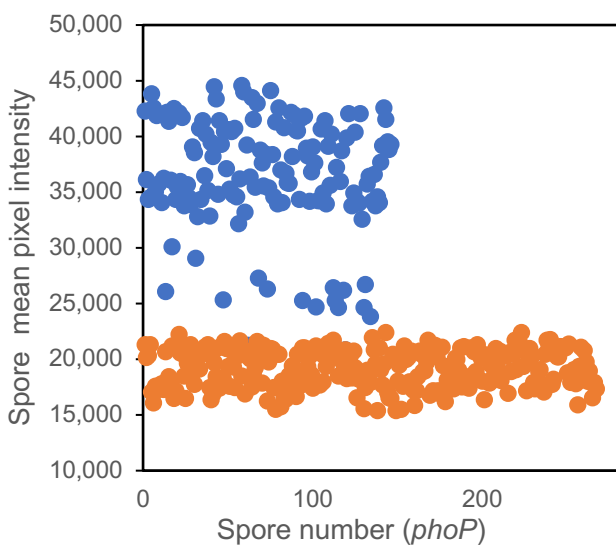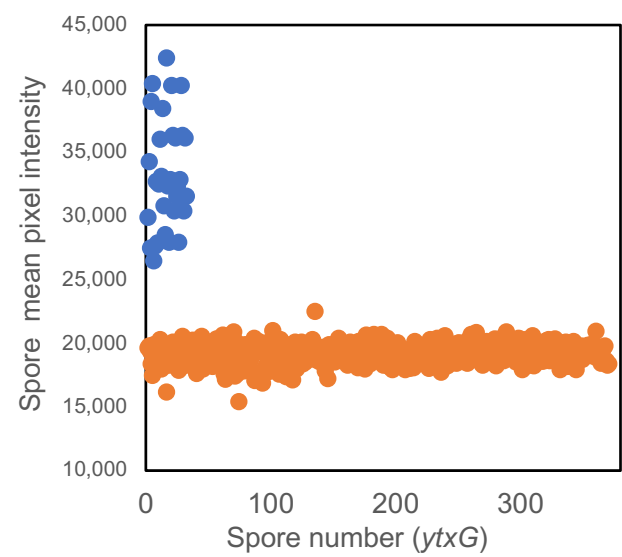

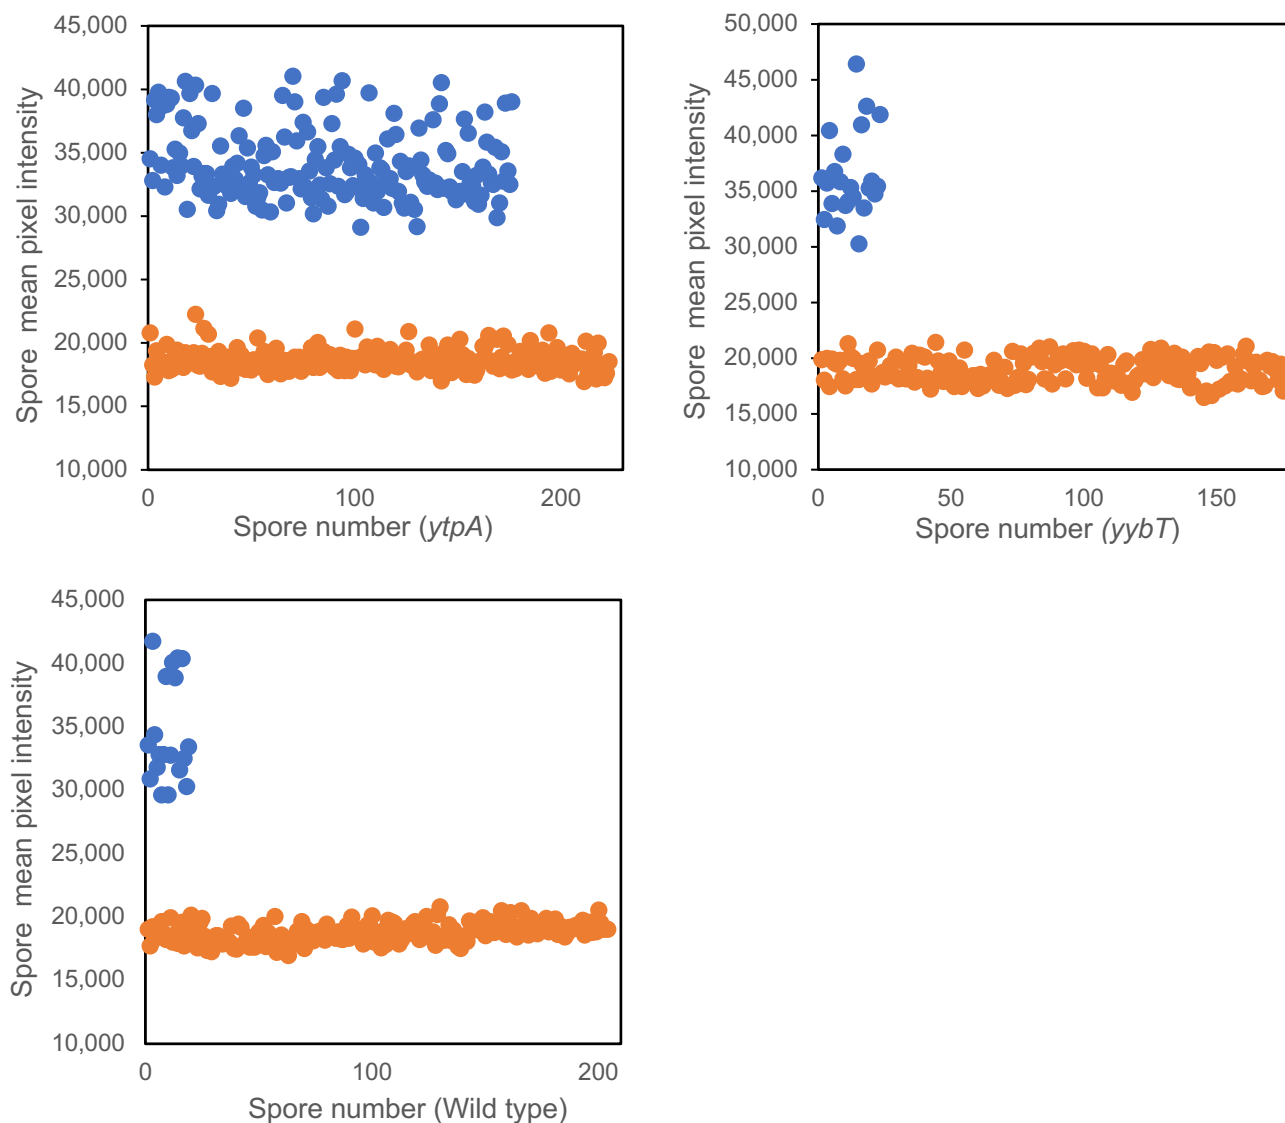

**Figure C. Phase contrast microscopy image pixel intensities during spore germination.**

Spores were subjected to germination conditions, 10 mM L-Valine at 37°C, for 1 hour. For each strain, pixel intensities were averaged for each spore detected in three images, including a range of 127-509 spores (Each dot represents one spore). Blue dots indicate spores classified as phase bright, which had similar intensities as spores in the initial dormant population, and orange dots indicate spores classified as phase-dark, in order to determine population percentages in Table 3. Phase bright and phase dark spores are plotted independently on the X-axes.

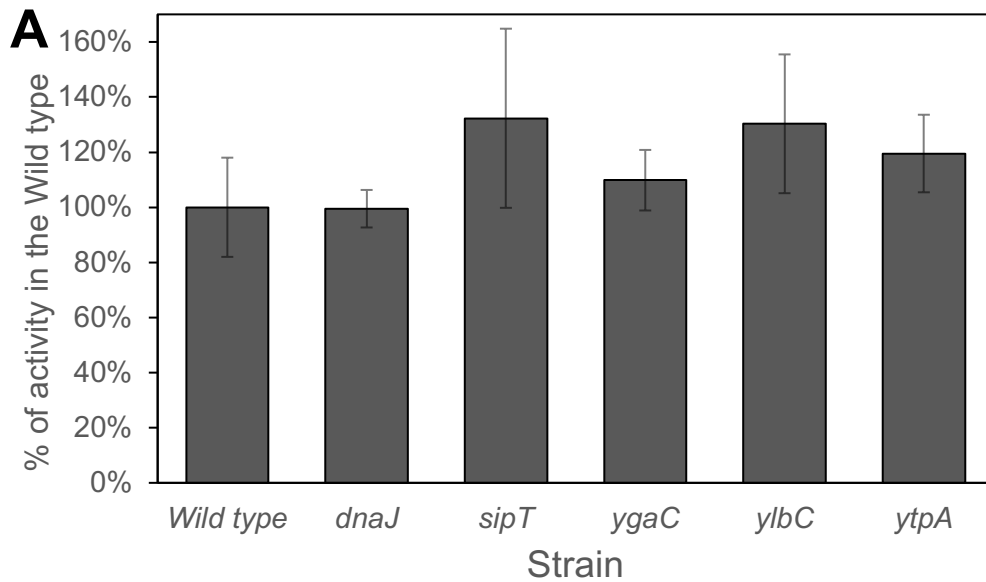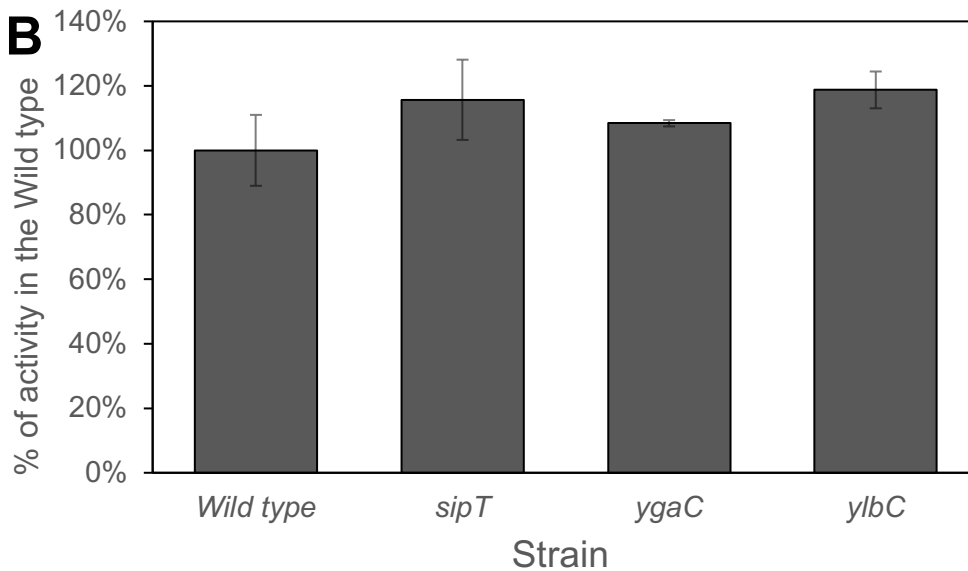

**Figure D. Expression of  $\sigma^G$ -dependent genes in *B. subtilis* mutant strains.** Purified spores carrying *lacZ* transcriptional fusions were decoated and lysed, and extracts were assayed for  $\beta$ -galactosidase. Values are expressed as a percentage of that detected in the wild type strain containing the same *lacZ* fusion. Values are averages of assays on three (A, *pbpF-lacZ*) or two (B, *sspB-lacZ*) replicate spore preparations and error bars are standard deviations.

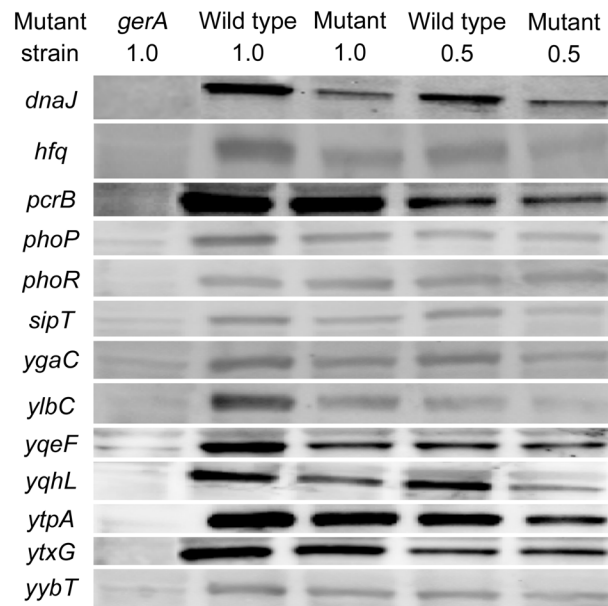

**Figure E. GerAC is reduced in the spores of several *B. subtilis* mutant strains.** Equal quantities of spore suspensions were decoated and broken, and proteins were extracted, serially diluted, run on SDS-PAGE, and transferred to PVDF membrane as described previously [5]. The membrane was probed with anti-GerAC antibodies [6]. Strain genotype (All strains were also  $\Delta gerB$ ) and sample dilution is indicated above each lane or on the left of each panel.

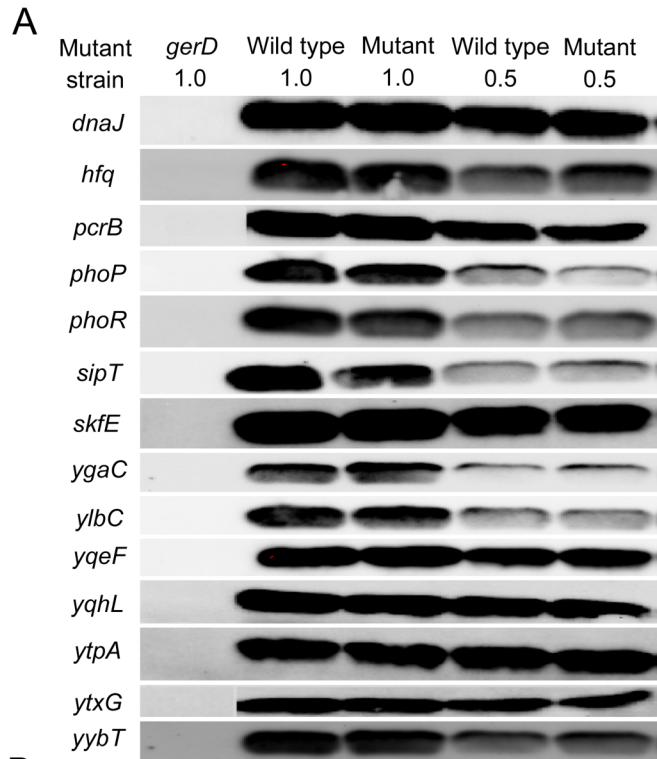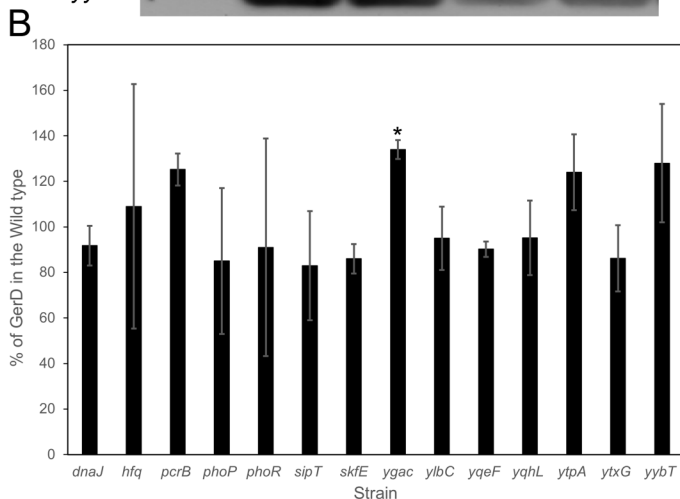

**Figure F. GerD is not reduced in the spores of *B. subtilis* germination mutants.**

Equal quantities of spore suspensions were de-coated and broken, and proteins were extracted, serially diluted, run on SDS-PAGE, and transferred to PVDF membrane as described previously [5]. The membrane was probed with anti-GerD antibodies [6] (Panel A). Strain genotype (All strains were also  $\Delta gerB$ .) and sample dilution is indicated above each lane or on the left of each panel. Protein load and transfer to membrane in each lane was normalized as described in Materials and Methods, and the amount of GerD detected in each strain was compared to that found in the wild type (Panel B). Error bars indicate standard deviations. \* indicates a significant difference from the wild type ( $p \leq 0.05$ ).

## References

1. Paidhungat M, Setlow B, Driks A, Setlow P. Characterization of spores of *Bacillus subtilis* which lack dipicolinic acid. *J Bacteriol.* 2000;182(19):5505-12. PubMed PMID: 10986255.
2. Feavers IM, Foulkes J, Setlow B, Sun D, Nicholson W, Setlow P, et al. The regulation of transcription of the *gerA* spore germination operon of *Bacillus subtilis*. *Molec Microbiol.* 1990;4:275-82.
3. Zuberi AR, Moir A, Feavers IM. The nucleotide sequence and gene organization of the *gerA* spore germination operon of *Bacillus subtilis* 168. *Gene.* 1987;51(1):1-11. Epub 1987/01/01. PubMed PMID: 3110007.
4. Cabrera-Martinez RM, Tovar-Rojo F, Vepachedu VR, Setlow P. Effects of overexpression of nutrient receptors on germination of spores of *Bacillus subtilis*. *J Bacteriol.* 2003;185(8):2457-64. PubMed PMID: 12670969.
5. Stewart KA, Setlow P. Numbers of individual nutrient germinant receptors and other germination proteins in spores of *Bacillus subtilis*. *J Bacteriol.* 2013;195(16):3575-82. doi: 10.1128/JB.00377-13. PubMed PMID: 23749970; PubMed Central PMCID: PMC3754565.
6. Ramirez-Peralta A, Zhang P, Li YQ, Setlow P. Effects of sporulation conditions on the germination and germination protein levels of *Bacillus subtilis* spores. *Appl Environ Microbiol.* 2012;78(8):2689-97. Epub 2012/02/14. doi: 10.1128/AEM.07908-11. PubMed PMID: 22327596; PubMed Central PMCID: PMC3318806.
